# Supplementary material for: Tipping point detection and early warnings in climate, ecological, and human systems
Source: Copernicus journal article supplement (doi:10.5194/esd-15-1117-2024), 2024-08-19
Supplement: Supplementary file 1 [file esd-15-1117-2024-supplement.pdf]

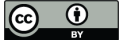

*Supplement of*

## **Tipping point detection and early warnings in climate, ecological, and human systems**

**Vasilis Dakos et al.**

*Correspondence to:* Vasilis Dakos ([vasilis.dakos@umontpellier.fr](mailto:vasilis.dakos@umontpellier.fr)) and Chris A. Boulton ([c.a.boulton@exeter.ac.uk](mailto:c.a.boulton@exeter.ac.uk))

The copyright of individual parts of the supplement might differ from the article licence.

## S1. Literature review classifications

We did a topic search (TS) in the Web of Science for the period from 01.01.2004 to 01.04.2023 with the following terms TS= ("tipping point\*" OR "tipping" OR "catastrophic bifurcation\*" OR "catastrophic shift\*" OR "regime shift\*" OR "abrupt shift\*" OR "critical transition\*") AND ("early-warning\*" OR "early-warning\*" OR "warning sign\*" OR "resilience indicator\*" OR "leading indicator\*" OR "precursor\*"). (<https://www.webofscience.com/wos/woscc/summary/5c5fcb5b-76a0-4f0e-ae3a-742d406641e5-82c738be/relevance/1>).

10 We reclassified data-sources and early-warnings in the following ways:

### Data-source

Survey = field survey, social study survey, monitoring data, historical climate data , weather station/ instrumental data [Medical data = EEG, hospitalisation records, metabolomics, gene/ protein expression from human/animal tissue => survey of patient health]

15 Paleo-data = sediment cores, paleo reconstruction

Experiment\_lab

Experiment\_field

Social data= financial data, epidemiological data, social media data

20 Early-warnings

Autocorrelation = cross-correlation, correlation coefficient, network\_correlation, correlation strength, autocorrelation at lag 1, autoregressive coefficient, autocorrelation at lag 1

Variance= variance CV, SD

Recovery rate = return rate, recovery rate

25 Power spectrum = spectral redness, low-to-high power spectrum, power spectrum density, spectral density, density ratio power spectrum

Spatial variance = spatial covariance, spatial variance

30 List of the 65 reclassified early-warnings:

---

| <b>early-warning</b>           | <b># papers</b> |
|--------------------------------|-----------------|
| variance                       | 136             |
| autocorrelation                | 119             |
| skewness                       | 38              |
| power_spectrum                 | 18              |
| recovery_rate                  | 16              |
| spatial_correlation            | 16              |
| spatial_variance               | 15              |
| dynamic_network_biomarkers     | 13              |
| kurtosis                       | 13              |
| spatial_pattern                | 7               |
| correlations                   | 6               |
| detrended_fluctuation_analysis | 6               |
| fisher                         | 5               |
| spatial_skewness               | 5               |
| criticality_index              | 4               |
| dynamical_eigenvalue           | 4               |
| network_structure              | 4               |
| deep_learning                  | 3               |
| network_correlation            | 3               |
| entropy                        | 2               |

|                                 |   |
|---------------------------------|---|
| heteroskedasticity              | 2 |
| hysteresis                      | 2 |
| nonlinearity                    | 2 |
| potential_analysis              | 2 |
| return_time                     | 2 |
| DNRS                            | 1 |
| Hidden_Markov_Model             | 1 |
| Kullback_Leibler_index          | 1 |
| MST_DNM_score                   | 1 |
| Marginal_expected_shortfall     | 1 |
| SRISK                           | 1 |
| competition_coefficient         | 1 |
| degenerate_fingerprinting       | 1 |
| degree_distribution             | 1 |
| delta_conditional_value_at_risk | 1 |
| diffusion                       | 1 |
| directed_affinity_segmentation  | 1 |
| drift_diffusion_jump            | 1 |
| dynamical_stability             | 1 |
| dysregulation_score_threshold   | 1 |
| eigenvalue                      | 1 |

|                                   |   |
|-----------------------------------|---|
| flickering                        | 1 |
| index_of_dispersion               | 1 |
| jump_intensity                    | 1 |
| landscape-DNB                     | 1 |
| local_Lyapunov_exponent           | 1 |
| motif_transition_intensity        | 1 |
| network_centrality                | 1 |
| nonstationary_probability_density | 1 |
| number_links                      | 1 |
| persistent_pattern                | 1 |
| recovery_length                   | 1 |
| recurrence_based_analysis         | 1 |
| shannon_entropy                   | 1 |
| simpson_diversity                 | 1 |
| spatial_fourier_transform         | 1 |
| spatial_return_time               | 1 |
| spatial_spectra                   | 1 |
| spectral_analysis                 | 1 |
| susceptibility                    | 1 |
| temporal_network_flow_entropy     | 1 |
| trait_mean                        | 1 |

transition-based\_network\_entropy 1

tropical\_forest\_vulnerability\_index 1

turbulence 1

---

## S2. Additional figures

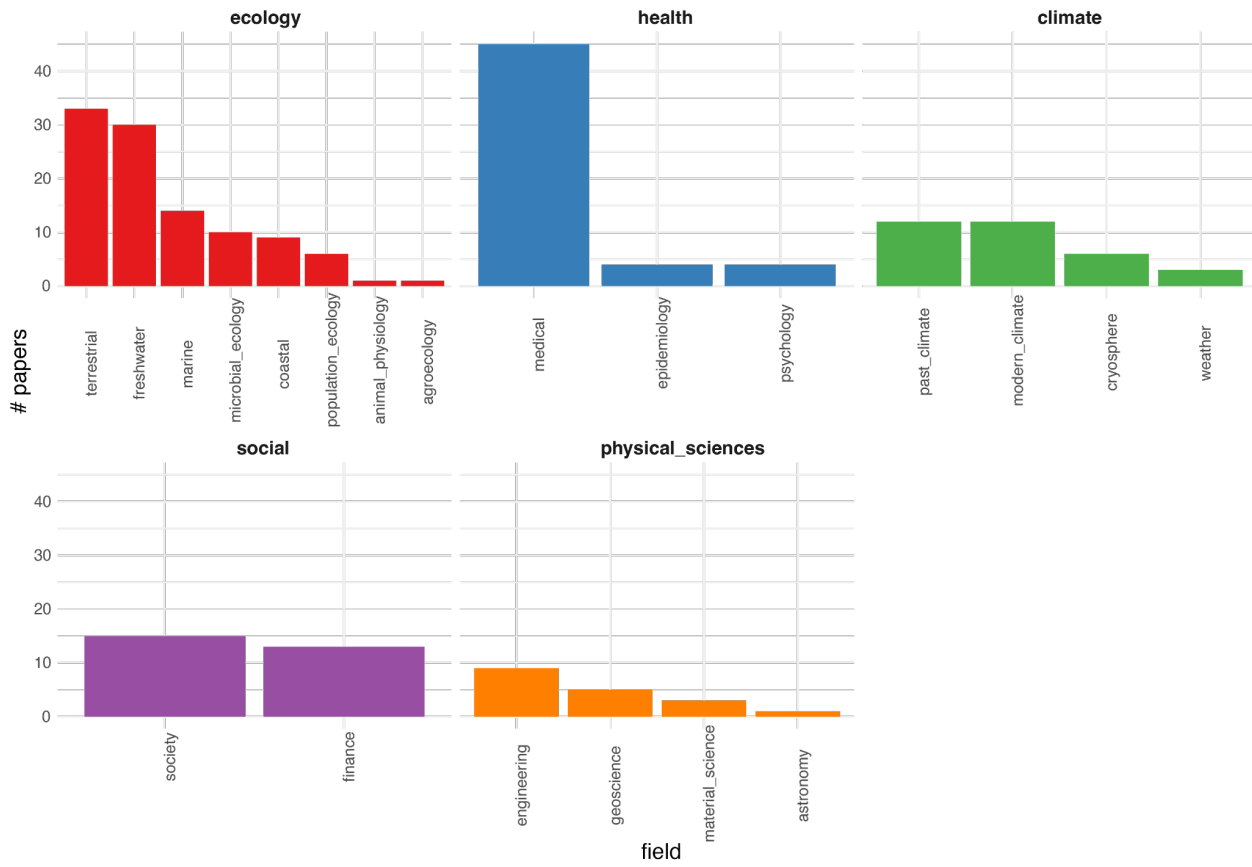

35

Figure S1: Fields within each scientific domain

40

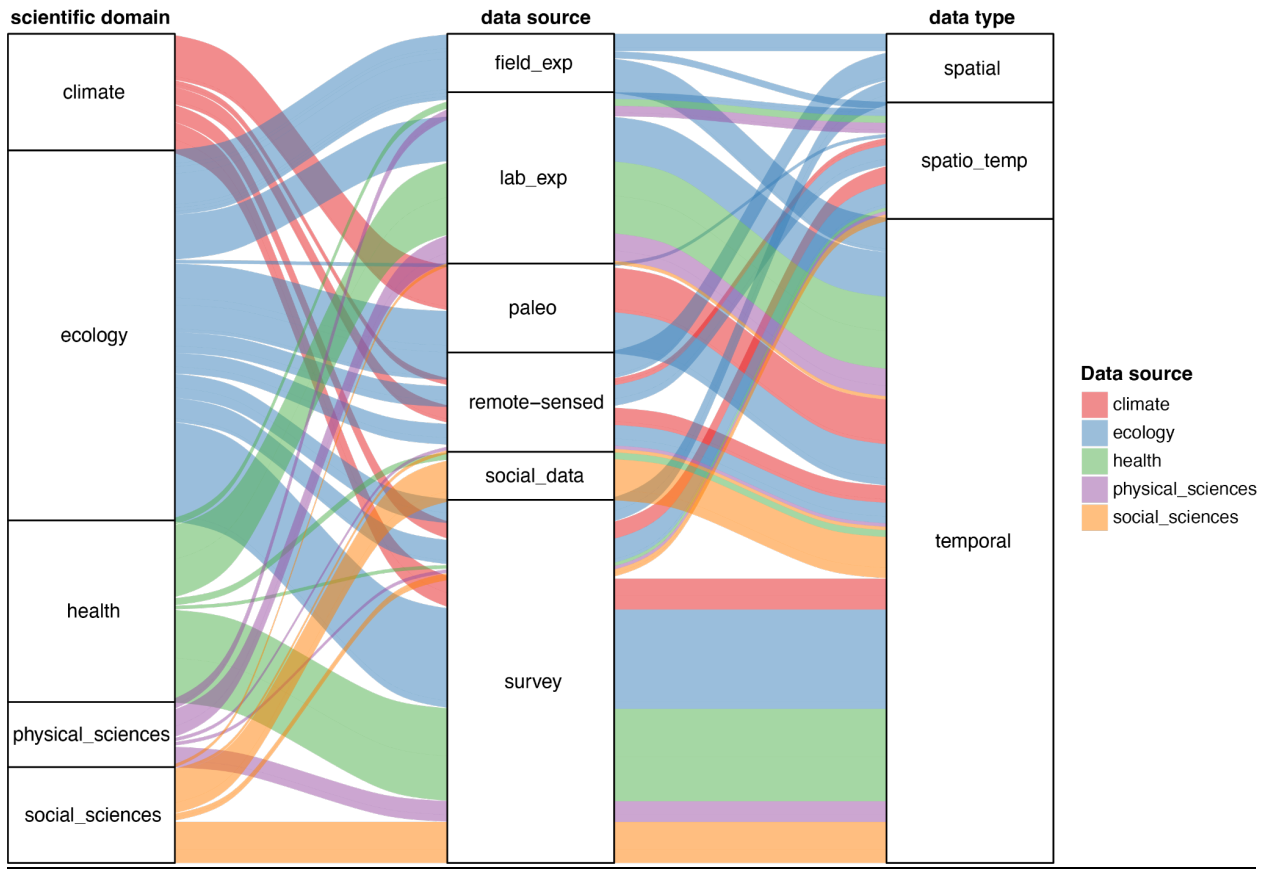

**Figure S2: Alluvial plot of scientific domain, data source and data types where the lines represent the partitioning of the papers based on the scientific domain**



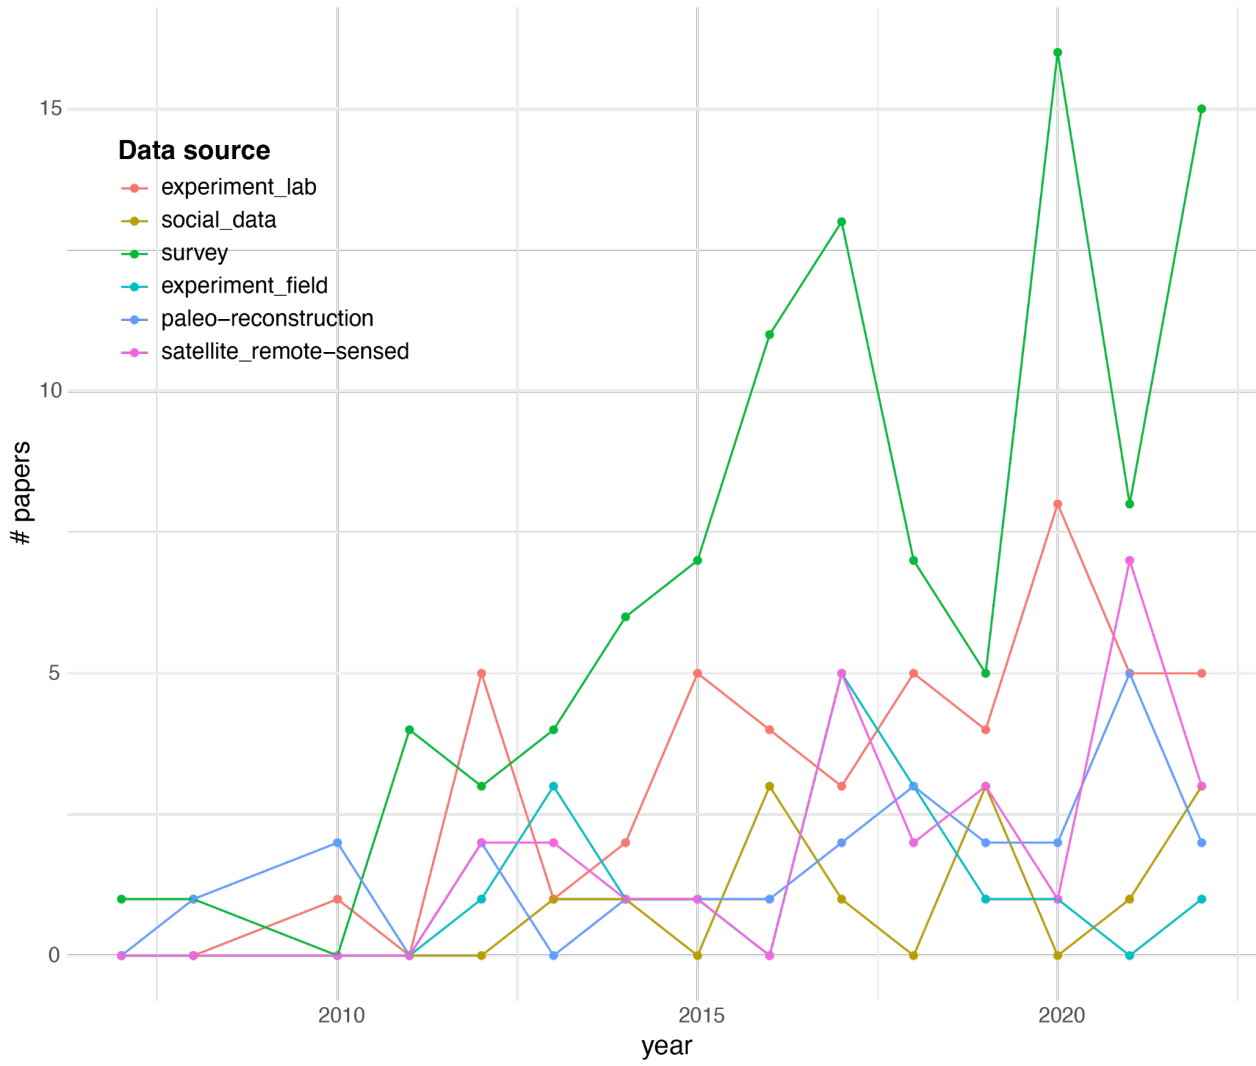

**Figure S3: Evolution of data sources over time**

45

50

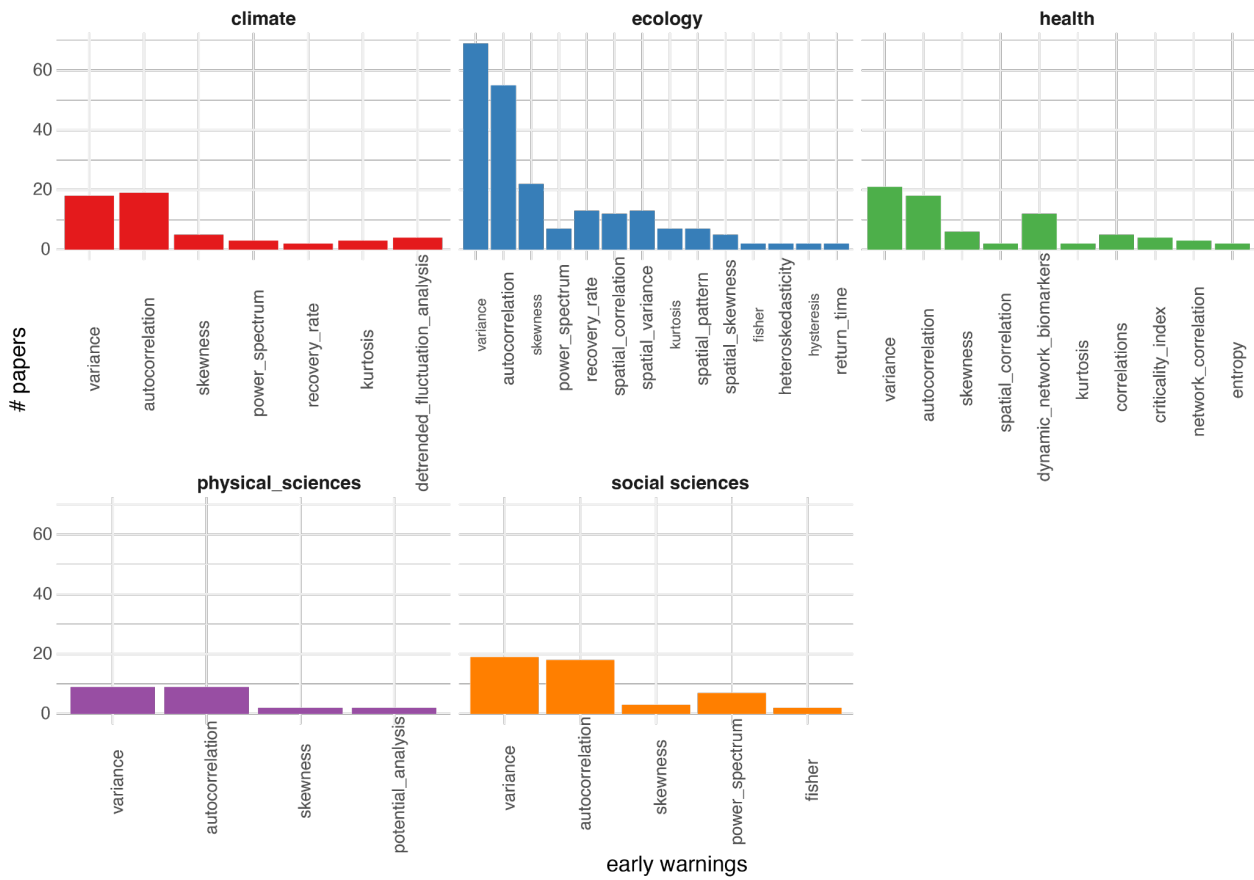

**Figure S4: All early-warnings used more than once per scientific domain**

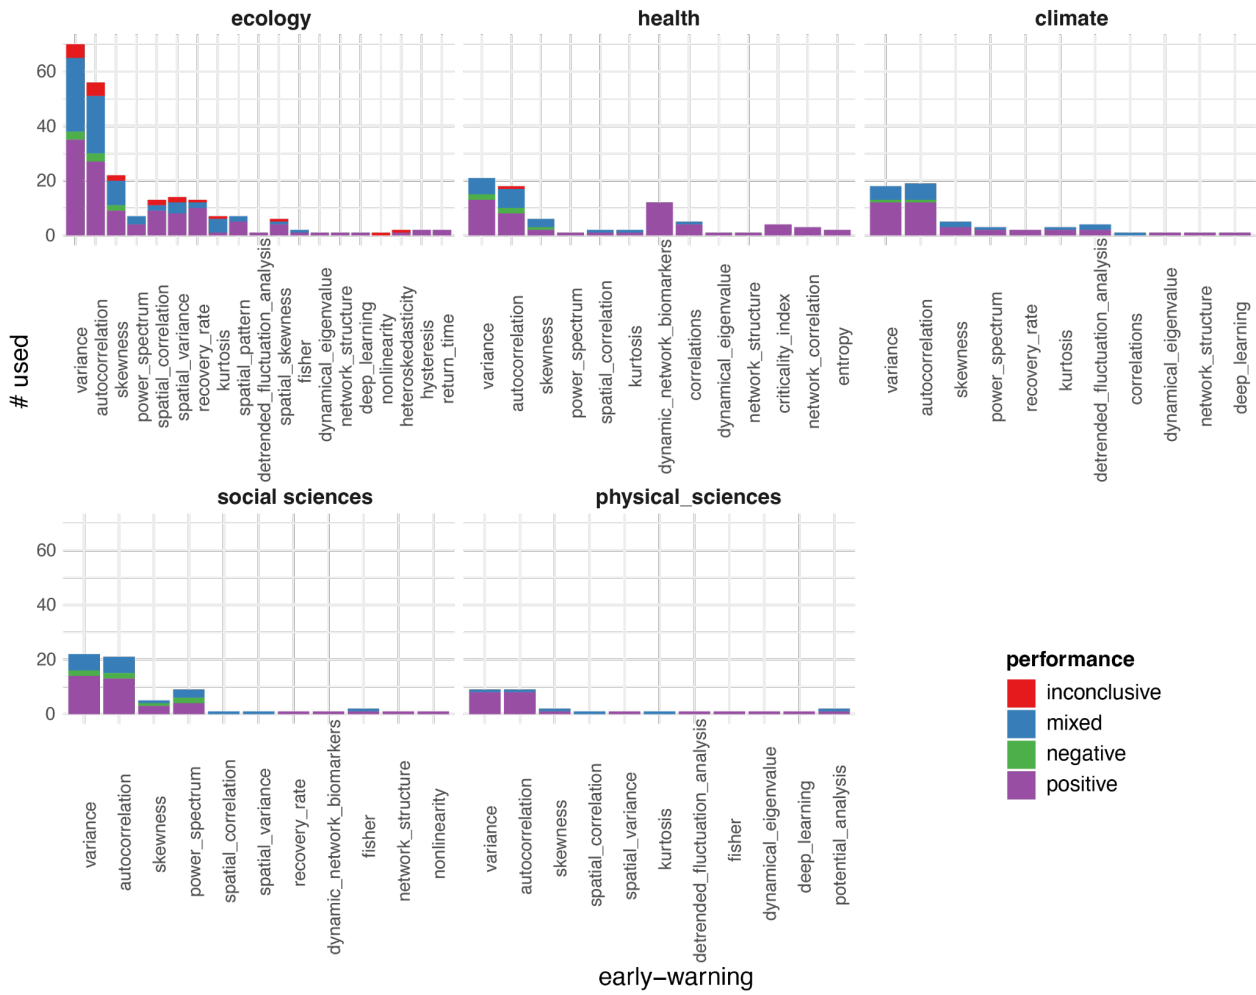

**Figure S5: Performance of early-warnings used more than once per domain**

### S3. Tables

**Table S1 - Ecology**

| Field             | System            | Tipping point            | Indicators                                                              | Performance                                                           | DOI                              |                            |
|-------------------|-------------------|--------------------------|-------------------------------------------------------------------------|-----------------------------------------------------------------------|----------------------------------|----------------------------|
| agroecology       | agroecosystem     | disease_onset            | recovery_rate                                                           | mixed                                                                 | 10.1038/s41598-022-05362-0       |                            |
| animal_physiology | salamander_vision | flicker_vision           | autocorrelation;variance;<br>kurtosis;skewness                          | mixed                                                                 | 10.1140/epjs/s11734-021-00113-0  |                            |
| coastal           | estuary           | eutrophication           | variance                                                                | positive                                                              | 10.1016/j.envpol.2020.115472     |                            |
|                   | intertidal        | canopy_loss              | spatial_correlation;spatial_varian<br>ce;spatial_skewness;spatial_spect | positive                                                              | 10.1002/ecy.2391                 |                            |
|                   | intertidal        | community_shift          | autocorrelation;variance                                                | mixed                                                                 | 10.1016/j.ecss.2013.05.005       |                            |
|                   | intertidal        | community_shift          | autocorrelation;variance;<br>skewness                                   | positive                                                              | 10.1016/j.cub.2015.05.035        |                            |
|                   | intertidal        | community_shift          | recovery_length                                                         | positive                                                              | 10.1038/s41559-017-0153          |                            |
|                   | intertidal        | community_shift          | variance                                                                | mixed                                                                 | 10.1002/ecm.1556                 |                            |
|                   | intertidal        | community_shift          | variance                                                                | positive                                                              | 10.3354/meps08626                |                            |
|                   | salt-marsh        | tidal_marsh_inundation   | recovery_rate;spatial_correlation<br>; spatial_variance                 | positive                                                              | 10.1038/ncomms15811              |                            |
|                   |                   | seagrass                 | population_collapse                                                     | recovery_rate                                                         | positive                         | 10.1038/s41598-018-34977-5 |
|                   | freshwater        | lake                     | algal_bloom                                                             | autocorrelation;variance;<br>spatial_correlation;<br>spatial_variance | mixed                            | 10.1002/eap.2616           |
| lake              |                   | community_shift          | autocorrelation;variance                                                | positive                                                              | 10.4319/lo.2013.58.2.0525        |                            |
| lake              |                   | community_shift          | autocorrelation;variance                                                | mixed                                                                 | 10.1111/1365-2664.12519          |                            |
| lake              |                   | community_shift          | heteroskedasticity                                                      | positive                                                              | 10.1007/s10021-012-9542-2        |                            |
| lake              |                   | community_shift          | spatial_variance                                                        | mixed                                                                 | 10.1890/ES13-00398.1             |                            |
| lake              |                   | community_shift          | variance;autocorrelation                                                | positive                                                              | 10.1073/pnas.1316721110          |                            |
| lake              |                   | community_shift          | variance;autocorrelation                                                | mixed                                                                 | 10.1007/s10452-017-9618-3        |                            |
| lake              |                   | community_shift          | variance; power_spectrum                                                | positive                                                              | 10.1111/j.1600-0706.2013.00539.x |                            |
| lake              |                   | community_shift          | variance;recovery_rate;skewness;<br>power_spectrum                      | positive                                                              | 10.1126/science.1203672          |                            |
| lake              |                   | community_shift          | variance;skewness;kurtosis;<br>autocorrelation;fisher                   | mixed                                                                 | 10.1371/journal.pone.0108936     |                            |
| lake              | community_shift   | variance;spatial_pattern | mixed                                                                   | 10.1098/rspb.2016.0249                                                |                                  |                            |

|        |             |                                    |                                                           |                           |                                  |
|--------|-------------|------------------------------------|-----------------------------------------------------------|---------------------------|----------------------------------|
|        | lake        | community_shift;<br>eutrophication | autocorrelation;variance                                  | mixed                     | 10.1016/j.ecolind.2020.106536    |
|        | lake        | community_shift;<br>eutrophication | autocorrelation;variance;<br>skewness; power_spectrum     | mixed                     | 10.1073/pnas.1608242113          |
|        | lake        | eutrophication                     | autocorrelation                                           | positive                  | 10.1371/journal.pone.0223366     |
|        | lake        | eutrophication                     | autocorrelation;variance                                  | positive                  | 10.1002/ecm.1286                 |
|        | lake        | eutrophication                     | autocorrelation;variance                                  | positive                  | 10.1073/pnas.1612424114          |
|        | lake        | eutrophication                     | autocorrelation;variance                                  | positive                  | 10.1002/ecs2.3200                |
|        | lake        | eutrophication                     | autocorrelation;variance;<br>hysteresis                   | positive                  | 10.1111/1365-2745.13544          |
|        | lake        | eutrophication                     | autocorrelation;variance;<br>skewness;kurtosis            | positive                  | 10.1016/j.scitotenv.2021.147059  |
|        | lake        | eutrophication                     | spatial_correlation;<br>spatial_variance;spatial_pattern  | positive                  | 10.1002/ecs2.1941                |
|        | lake        | eutrophication                     | variance                                                  | positive                  | 10.1038/nature11655              |
|        | lake        | eutrophication                     | variance;autocorrelation;<br>skewness                     | positive                  | 10.3390/w15061245                |
|        | lake        | eutrophication                     | variance;autocorrelation;<br>skewness; kurtosis           | mixed                     | 10.1002/eap.2685                 |
|        | lake        | extinction                         | dynamical_eigenvalue                                      | positive                  | 10.1126/sciadv.abq4558           |
|        | lake        | seizures                           | autocorrelation;variance;<br>skewness                     | negative                  | 10.1016/j.ecolind.2017.05.059    |
|        | lake        | vegetation_change                  | variance                                                  | positive                  | 10.1002/2017JG004135             |
|        | lake        | water_level                        | spatial_correlation;<br>spatial_variance;spatial_skewness | positive;<br>inconclusive | 10.4491/eer.2020.225             |
|        | lake;river  | dimictic_to_monomictic             | variance                                                  | positive                  | 10.1111/j.1365-2486.2010.02249.x |
|        | river       | eutrophication                     | variance;autocorrelation;<br>skewness                     | mixed                     | 10.1002/Ino.11789                |
|        | wetland     | community_shift                    | autocorrelation;variance;<br>skewness                     | positive                  | 10.3390/rs9040352                |
| marine | deep_waters | anoxia                             | autocorrelation;variance                                  | positive                  | 10.1029/2020GL089183             |
|        | deep_waters | anoxia                             | deep_learning                                             | positive                  | 10.1073/pnas.2106140118 1of9     |

5

|                   |                                |                     |                                                                       |                           |                               |
|-------------------|--------------------------------|---------------------|-----------------------------------------------------------------------|---------------------------|-------------------------------|
|                   | fisheries                      | community_shift     | variance                                                              | positive                  | 10.1890/07-0998.1             |
|                   | fisheries                      | overexploitation    | nonlinearity                                                          | inconclusive              | 10.1098/rsif.2016.0845        |
|                   | fisheries                      | overexploitation    | variance;spatial_skewness;<br>spatial_variance                        | mixed                     | 10.1890/12-0670.1             |
|                   | fisheries                      | population_collapse | autocorrelation;variance                                              | mixed                     | 10.1016/j.ecolind.2020.106371 |
|                   | fisheries                      | population_collapse | autocorrelation;variance                                              | mixed                     | 10.1098/rspb.2013.3221        |
|                   | lake;<br>marine_community      | community_shift     | autocorrelation;variance                                              | mixed                     | 10.1111/1365-2664.12519       |
|                   | marine_community               | community_shift     | autocorrelation;variance                                              | positive                  | 10.1016/j.ecss.2014.10.017    |
|                   | marine_community               | community_shift     | autocorrelation;variance;<br>spatial_variance;<br>spatial_correlation | inconclusive              | 10.1371/journal.pone.0038410  |
|                   | marine_community               | community_shift     | shannon_entropy;<br>simpson_diversity                                 | positive                  | 10.1016/j.palaeo.2017.07.042  |
|                   | marine_community               | past_climate_shifts | variance;autocorrelation                                              | inconclusive;<br>negative | 10.1007/s10661-021-09463-7    |
|                   | marine_community;<br>fisheries | community_shift     | autocorrelation;variance                                              | mixed                     | 10.1002/ecs2.1614             |
|                   | marine_community;<br>fisheries | community_shift     | autocorrelation;variance;<br>spatial_correlation;hysteresis           | positive                  | 10.3354/meps12137             |
| microbial_ecology | methane-consumption            | resilience_loss     | recovery_rate                                                         | positive                  | 10.1038/s41598-018-27168-9    |
|                   | phytoplankton                  | extinction          | recovery_rate;autocorrelation;<br>variance                            | positive                  | 10.1038/nature10723           |
|                   | protists                       | extinction          | autocorrelation;recovery_rate;<br>variance;skewness;kurtosis          | inconclusive              | 10.1007/s10750-016-2948-7     |
|                   | protists                       | extinction          | autocorrelation;variance;<br>power_spectrum;recovery_rate             | positive                  | 10.1038/ncomms10984           |
|                   | protists                       | population_collapse | variance;autocorrelation                                              | inconclusive              | 10.1002/ecy.3040              |
|                   | yeast                          | extinction          | autocorrelation;variance;<br>recovery_rate;skewness                   | positive                  | 10.1126/science.1219805       |
|                   | yeast                          | extinction          | recovery_rate;autocorrelation;<br>variance                            | positive                  | 10.1038/s41598-018-27573-0    |

|                    |                       |                                     |                                                                                          |              |                              |
|--------------------|-----------------------|-------------------------------------|------------------------------------------------------------------------------------------|--------------|------------------------------|
|                    | yeast                 | population_collapse                 | autocorrelation;variance                                                                 | mixed        | 10.1073/pnas.1418415112      |
|                    | yeast                 | population_collapse                 | spatial_return_time                                                                      | positive     | 10.1038/nature12071          |
|                    | zooplankton           | population_collapse                 | autocorrelation;variance;<br>skewness; spatial_correlation                               | positive     | 10.1038/nature09389          |
| population_ecology | bobwhite_quail        | extinction                          | variance                                                                                 | positive     | 10.1007/s12080-013-0195-3    |
|                    | Drosophila            | population_collapse                 | autocorrelation;variance;<br>power_spectrum;recovery_rate;<br>trait_mean                 | mixed        | 10.1111/1365-2656.13474      |
|                    | freshwater_population | extinction                          | autocorrelation;recovery_rate;<br>variance                                               | positive     | 10.1002/ece3.2339            |
|                    | honeycreepers         | extinction                          | autocorrelation;variance;<br>skewness                                                    | negative     | 10.1371/journal.pone.0187518 |
|                    | protists              | population_collapse                 | autocorrelation;power_spectrum<br>; recovery_rate;variance                               | positive     | 10.1086/681573               |
|                    | sea-cucumber;penguin  | community_shift                     | variance                                                                                 | mixed        | 10.1890/ES11-00216.1         |
| terrestrial        | drylands              | community_shift                     | autocorrelation;variance;<br>power_spectrum;skewness                                     | mixed        | 10.1086/694821               |
|                    | drylands              | community_shift                     | spatial_correlation;<br>spatial_variance;spatial_skewness<br>; spatial_fourier_transform | positive     | 10.1111/geb.12570            |
|                    | drylands              | desertification                     | spatial_pattern                                                                          | positive     | 10.1038/nature06111          |
|                    | drylands              | desertification                     | spatial_pattern                                                                          | positive     | 10.1038/s41559-016-0003      |
|                    | drylands              | desertification                     | spatial_skewness;spatial_variance<br>;spatial_correlation;<br>spatial_pattern            | positive     | 10.1111/ecog.06139           |
|                    | drylands              | desertification                     | variance                                                                                 | positive     | 10.1002/lid.4466             |
|                    | drylands              | desertification;<br>community_shift | spatial_variance                                                                         | positive     | 10.3389/fevo.2019.00407      |
|                    | drylands              | overexploitation                    | spatial_pattern                                                                          | mixed        | 10.1111/ele.12045            |
|                    | forest                | community_shift                     | heteroskedasticity                                                                       | inconclusive | 10.1038/s41598-018-19985-9   |
|                    | forest                | desertification;extinction          | autocorrelation;<br>tropical_forest_vulnerability_ind                                    | positive     | 10.1016/j.oneear.2021.06.002 |

|  |                                                  |                                                           |                                                             |              |                                 |
|--|--------------------------------------------------|-----------------------------------------------------------|-------------------------------------------------------------|--------------|---------------------------------|
|  | forest                                           | desertification;extinction                                | spatial_pattern                                             | positive     | 10.1007/s10980-017-0553-4       |
|  | forest                                           | desertification;<br>tree_mortality                        | autocorrelation;variance;<br>detrended_fluctuation_analysis | positive     | 10.1038/s41558-022-01287-8      |
|  | forest                                           | desertification;<br>tree_mortality;<br>past_climate_shfts | autocorrelation;variance                                    | mixed        | 10.1016/j.quascirev.2019.01.009 |
|  | forest                                           | forest_carbon_uptake                                      | skewness;autocorrelation;variance;<br>kurtosis              | mixed        | 10.1111/gcb.14664               |
|  | forest                                           | forest_grassland_transition                               | spatial_variance;<br>spatial_correlation                    | positive     | 10.1002/ecy.2722                |
|  | forest                                           | tree_death                                                | variance                                                    | mixed        | 10.3389/fpls.2017.00135         |
|  | forest                                           | tree_mortality                                            | autocorrelation                                             | positive     | 10.1038/s41558-019-0583-9       |
|  | forest                                           | tree_mortality                                            | autocorrelation;variance                                    | positive     | 10.3389/fpls.2018.01964         |
|  | forest                                           | tree_mortality                                            | competition_coefficient                                     | positive     | 10.1016/j.ecolind.2021.107506   |
|  | forest                                           | tree_mortality                                            | variance;autocorrelation;<br>skewness                       | inconclusive | 10.1016/j.agrformet.2022.109103 |
|  | forest                                           | tree_mortality                                            | variance;autocorrelation;<br>skewness                       | mixed        | 10.1111/1365-2745.12295         |
|  | forest                                           | tree_mortality                                            | variance;drift_diffusion_jump                               | mixed        | 10.1088/1748-9326/10/8/084021   |
|  | grassland                                        | community_shift                                           | spatial_correlation;<br>spatial_variance                    | mixed        | 10.1111/1365-2745.12696         |
|  | grassland                                        | desertification                                           | variance;skewness                                           | positive     | 10.1111/ele.13126               |
|  | land-use                                         | land_surface_change                                       | autocorrelation;variance;<br>skewness                       | positive     | 10.1073/pnas.1220161110         |
|  | land-use                                         | land_surface_change                                       | network_structure                                           | positive     | 10.1016/j.ecolind.2014.05.018   |
|  | peatlands                                        | drought                                                   | return_time                                                 | positive     | 10.1016/j.scitotenv.2020.143312 |
|  | peatlands                                        | fire_recovery                                             | return_time                                                 | positive     | 10.1088/2515-7620/ac1a5f        |
|  | sea-cucumber; penguin;<br>terrestrial_vegetation | community_shift                                           | variance                                                    | mixed        | 10.1890/ES11-00216.1            |
|  | terrestrial_community                            | spatial_regimes                                           | fisher                                                      | positive     | 10.1111/ele.12709               |
|  | terrestrial_vegetation                           | ecological_regime_shift                                   | autocorrelation;variance                                    | positive     | 10.1038/s41558-022-01352-2      |
|  | terrestrial_vegetation                           | ecological_regime_shift                                   | autocorrelation;variance;<br>skewness; kurtosis             | mixed        | 10.1038/s43247-021-00163-1      |
|  | terrestrial_vegetation                           | resilience_loss                                           | variance;autocorrelation                                    | mixed        | 10.5194/esd-14-173-2023         |



**Table S2 - Climate**

| Field          | System                                          | Tipping point           | Indicators                                                       | Performance  | DOI                             |
|----------------|-------------------------------------------------|-------------------------|------------------------------------------------------------------|--------------|---------------------------------|
| cryosphere     | Antarctic_ice_sheet                             | deglaciation            | directed_affinity_segmentation                                   | positive     | 10.5194/npg-28-153-2021         |
|                | arctic_sea_ice                                  | deglaciation            | autocorrelation;<br>detrended_fluctuation_analysis               | mixed        | 10.5194/tc-7-275-2013           |
|                | arctic_sea_ice                                  | deglaciation            | variance                                                         | positive     | 10.1007/s13280-011-0224-7       |
|                | arctic_sea_ice                                  | sea_ice_loss            | nonstationary_probability_density                                | inconclusive | 10.1103/PhysRevE.88.052917      |
|                | arctic_sea_ice                                  | sea_ice_loss            | variance                                                         | mixed        | 10.1007/s13280-011-0223-8       |
|                | Greenland_ice_sheet                             | deglaciation            | autocorrelation;variance                                         | positive     | 10.1073/pnas.2024192118 1of7    |
| modern_climate | AMOC                                            | AMOC_collapse           | autocorrelation                                                  | positive     | 10.1038/s41467-022-32704-3      |
|                | AMOC                                            | AMOC_collapse           | autocorrelation;variance;<br>recovery_rate                       | positive     | 10.1038/s41558-021-01097-4      |
|                | atmosphere                                      | wind_extreme_events     | autocorrelation;variance                                         | positive     | 10.3390/atmos11090952           |
|                | atmospheric_boundary_layer                      | temperature_inversion   | dynamical_stability                                              | mixed        | 10.1175/JAS-D-19-0287.1         |
|                | earth_climate                                   | temperature             | autocorrelation;variance;<br>skewness;kurtosis                   | positive     | 10.1038/s41598-018-28386-x      |
|                | El_Nino                                         | onset_elnino            | susceptibility;number_links;<br>degree_distribution;correlations | mixed        | 10.1103/PhysRevE.103.L040301    |
|                | El_Nino                                         | thermohaline_circulatio | network_structure                                                | positive     | 10.1038/srep29552               |
|                | European_climate                                | abrupt_warming          | skewness                                                         | positive     | 10.1029/2020GL089794            |
|                | hydrological                                    | flooding                | variance;power_spectrum                                          | positive     | 10.1038/s41598-021-86739-5      |
|                | hydrological                                    | precipitation           | variance;autocorrelation;skewness                                | mixed        | 10.5194/hess-26-1845-2022       |
| past_climate   | monsoon                                         | monsoon_intensity_shift | autocorrelation;variance                                         | mixed        | 10.5194/cp-11-1621-2015         |
|                | PDO                                             | regime_shift            | autocorrelation;variance                                         | positive     | 10.1088/1674-1056/24/8/089201   |
|                | BA;YD;<br>antarctica_glacial_terminatio         | past_climate_shifts     | autocorrelation;<br>detrended_fluctuation_analysis               | positive     | 10.1098/rsta.2011.0304          |
|                | BA;YD;Eocene;<br>sahel_desertification;intersta | past_climate_shifts     | autocorrelation                                                  | positive     | 10.1073/pnas.0802430105         |
|                | Cenozoic                                        | past_climate_shifts     | autocorrelation;variance                                         | mixed        | 10.1016/j.quascirev.2021.107177 |
|                | DO_events                                       | past_climate_shifts     | autocorrelation;variance                                         | negative     | 10.1029/2010GL044486            |

|         |                         |                     |                                                                                                             |          |                              |
|---------|-------------------------|---------------------|-------------------------------------------------------------------------------------------------------------|----------|------------------------------|
|         | DO_events               | past_climate_shifts | autocorrelation;variance;<br>skewness;kurtosis                                                              | positive | 10.1007/s00382-014-2405-0    |
|         | greenhouse_earth        | past_climate_shifts | dynamical_eigenvalue                                                                                        | positive | 10.1126/sciadv.abq4558       |
|         | interstadials;YD        | past_climate_shifts | variance                                                                                                    | positive | 10.1175/JCLI-D-15-0828.1     |
|         | Little_Ice_Age          | past_climate_shifts | variance;autocorrelation                                                                                    | positive | 10.1038/s41467-022-32653-x   |
|         | North_Pacific_sea_level | past_climate_shifts | local_Lyapunov_exponent                                                                                     | positive | 10.1007/s00382-021-05676-1   |
|         | past_climate            | past_climate_shifts | deep_learning                                                                                               | positive | 10.1073/pnas.2106140118 1of9 |
|         | past_climate            | past_climate_shifts | variance                                                                                                    | positive | 10.1007/s10933-018-0047-7    |
|         | PETM;ETM2               | past_climate_shifts | autocorrelation;variance;detrende<br>d_fluctuation_analysis;skewness;<br>kurtosis; diffusion;jump_intensity | mixed    | 10.5194/cp-14-1515-2018      |
| weather | cyclones                | cyclone_formation   | autocorrelation;eigenvalue;<br>power_spectrum                                                               | mixed    | 10.1063/1.5093495            |
|         | cyclones                | storm_development   | autocorrelation;detrended_fluctu<br>ation_analysis;power_spectrum                                           | positive | 10.1209/0295-5075/121/10002  |
|         | heatwaves               | heatwaves           | autocorrelation;recovery_rate;<br>variance                                                                  | positive | 10.1029/2020GL088503         |

5

**Table S3 - Health**

| Field        | System                  | Tipping point     | Indicators                                                      | Performance | DOI                          |
|--------------|-------------------------|-------------------|-----------------------------------------------------------------|-------------|------------------------------|
| epidemiology | COVID                   | epidemic_outbreak | autocorrelation;variance;skewness; kurtosis                     | positive    | 10.1371/journal.pcbi.1009958 |
|              | COVID                   | epidemic_outbreak | variance;autocorrelation                                        | mixed       | 10.3389/fpubh.2020.569669    |
|              | COVID                   | epidemic_outbreak | variance;autocorrelation;skewness                               | mixed       | 10.1098/rsbl.2021.0487       |
|              | foot_hand_mouth_disease | epidemic_outbreak | dynamic_network_biomarkers                                      | positive    | 10.1186/s12879-020-05709-w   |
| medical      | cancer                  | cancer_growth     | autocorrelation                                                 | positive    | 10.3389/fgene.2015.00252     |
|              | cancer                  | cancer_growth     | criticality_index                                               | positive    | 10.3389/fbioe.2020.00530     |
|              | cancer                  | cancer_growth     | dynamic_network_biomarkers                                      | positive    | 10.3390/genes8100268         |
|              | cancer                  | cancer_growth     | variance;network_correlation                                    | positive    | 10.1007/s12282-023-01438-5   |
|              | disease                 | disease_onset     | autocorrelation;variance;index_of_ dispersion;skewness;kurtosis | mixed       | 10.1098/rsif.2022.0123       |
|              | disease                 | disease_onset     | autocorrelation;variance;skewness; spatial_correlation          | mixed       | 10.1007/s00477-014-0887-2    |
|              | disease                 | disease_onset     | correlations;variance                                           | positive    | 10.3389/fonc.2021.684781     |
|              | disease                 | disease_onset     | correlations;variance                                           | positive    | 10.1155/2018/6807059         |
|              | disease                 | disease_onset     | dynamic_network_biomarkers                                      | positive    | 10.1016/j.gene.2021.145997   |
|              | disease                 | disease_onset     | dynamic_network_biomarkers                                      | positive    | 10.1038/srep00342            |
|              | disease                 | disease_onset     | dynamic_network_biomarkers                                      | positive    | 10.1111/jcmm.13943           |
|              | disease                 | disease_onset     | dynamic_network_biomarkers                                      | positive    | 10.3390/genes11060676        |
|              | disease                 | disease_onset     | dynamic_network_biomarkers                                      | positive    | 10.1093/jmcb/mjac052         |
|              | disease                 | disease_onset     | dynamic_network_biomarkers                                      | positive    | 10.3390/e24091249            |
|              | disease                 | disease_onset     | dynamic_network_biomarkers                                      | positive    | 10.1093/jmcb/mjw016          |
|              | disease                 | disease_onset     | dynamic_network_biomarkers                                      | positive    | 10.1016/j.ymeth.2014.01.021  |
|              | disease                 | disease_onset     | dynamic_network_biomarkers; variance;correlations               | positive    | 10.1038/s41598-019-45119-w   |
|              | disease                 | disease_onset     | dysregulation_score_threshold                                   | positive    | 10.1093/bfgp/elad006         |
|              | disease                 | disease_onset     | entropy                                                         | positive    | 10.1038/srep00813            |
|              | disease                 | disease_onset     | entropy                                                         | positive    | 10.1371/journal.pone.0180937 |
|              | disease                 | disease_onset     | MST_DNM_score                                                   | positive    | 10.1155/2020/7351398         |
|              | disease                 | disease_onset     | temporal_network_flow_entropy; dynamic_network_biomarkers       | positive    | 10.1093/bib/bbac164          |

|            |                      |                                       |                                                        |              |                                |
|------------|----------------------|---------------------------------------|--------------------------------------------------------|--------------|--------------------------------|
|            | disease              | disease_onset                         | transition-based_network_entropy                       | positive     | 10.1016/j.ymeth.2015.05.004    |
|            | disease              | disease_onset                         | variance                                               | positive     | 10.1016/j.isci.2022.104385     |
|            | disease              | disease_onset                         | variance;autocorrelation                               | positive     | 10.1016/j.envint.2018.09.007   |
|            | disease              | disease_onset                         | variance;autocorrelation;correlations                  | mixed        | 10.1093/gerona/glx065          |
|            | disease              | disease_onset                         | variance;skewness                                      | positive     | 10.1098/rsph.2017.0882         |
|            | epilepsy             | seizures                              | autocorrelation;variance                               | negative     | 10.1063/1.5122759              |
|            | epilepsy             | seizures                              | power_spectrum;<br>spatial_correlation;autocorrelation | positive     | 10.1073/pnas.1210047110        |
|            | epilepsy             | seizures                              | variance                                               | positive     | 10.1371/journal.pone.0030371   |
|            | epilepsy             | seizures                              | variance;autocorrelation                               | positive     | 10.1038/s41467-020-15908-3     |
|            | epilepsy             | seizures                              | variance;autocorrelation;skewness                      | negative     | 10.1142/S0129065716500532      |
|            | physiology           | cancer_growth                         | criticality_index                                      | positive     | 10.1038/s41467-018-03024-2     |
|            | physiology           | disease_onset                         | Hidden_Markov_Model                                    | positive     | 10.3389/fgene.2019.00285       |
|            | physiology           | disease_onset                         | Kullback_Leibler_index                                 | positive     | 10.1186/s12864-020-6490-7      |
|            | physiology           | disease_onset                         | landscape-DNB                                          | positive     | 10.1093/nsr/nwy162             |
|            | physiology           | embryonic_development;<br>metastasis  | DNRS                                                   | positive     | 10.1093/bioinformatics/btac707 |
|            | physiology           | epithelial-<br>mesenchymal_transition | criticality_index                                      | positive     | 10.1016/j.scib.2020.01.013     |
|            | physiology           | exercise                              | network_structure                                      | positive     | 10.1016/j.physa.2020.125108    |
|            | physiology           | gene_correlation                      | network_correlation                                    | positive     | 10.1093/nar/gkx787             |
|            | physiology           | gene_correlation                      | network_correlation                                    | positive     | 10.1093/jmcb/mjx021            |
|            | physiology           | hypoxia                               | dynamical_eigenvalue                                   | positive     | 10.1126/sciadv.abq4558         |
|            | physiology           | lung_cancer                           | criticality_index                                      | positive     | 10.1016/j.jhazmat.2021.128089  |
|            | physiology           | neuron_spiking                        | autocorrelation;variance                               | positive     | 10.1371/journal.pcbi.1004097   |
|            | physiology           | sleep_dynamics                        | variance;autocorrelation                               | positive     | 10.1016/j.cmpb.2020.105448     |
| psychology | bi-polar_disorder    | depression_onset                      | autocorrelation                                        | mixed        | 10.1186/s40345-022-00258-4     |
|            | depression           | depression_onset                      | autocorrelation;variance                               | mixed        | 10.1177/21677026221137006      |
|            | depression           | depression_onset                      | variance;autocorrelation;<br>correlations              | positive     | 10.1073/pnas.1312114110        |
|            | depression;alzheimer | depression_alzheimer_on               | autocorrelation                                        | inconclusive | 10.1080/09296174.2017.1405719  |

**Table S4 - Social sciences**

| Field   | System                 | Tipping point                  | Indicators                                                                                   | Performance                 | DOI                           |
|---------|------------------------|--------------------------------|----------------------------------------------------------------------------------------------|-----------------------------|-------------------------------|
| finance | crypto_market          | market_crash                   | turbulence                                                                                   | positive                    | 10.1016/j.physa.2019.123843   |
|         | crypto_market          | price_collapse                 | variance;autocorrelation                                                                     | mixed                       | 10.1098/rsos.191450           |
|         | stockmarket            | bankruptcy                     | spatial_correlation;spatial_variance                                                         | mixed                       | 10.1038/srep01898             |
|         | stockmarket            | bankruptcy                     | variance;autocorrelation                                                                     | positive                    | 10.3389/fams.2022.940133      |
|         | stockmarket            | financial_crisis               | autocorrelation;variance;power_spectrum                                                      | negative                    | 10.1371/journal.pone.0144198  |
|         | stockmarket            | financial_crisis               | Marginal_expected_shortfall;<br>delta_conditional_value_at_risk;<br>SRISK;network_centrality | mixed                       | 10.1007/s10479-021-04120-1    |
|         | stockmarket            | financial_crisis               | variance;autocorrelation                                                                     | positive                    | 10.1016/j.physa.2019.121392   |
|         | stockmarket            | stock_crash                    | autocorrelation;variance;power_spectrum                                                      | mixed                       | 10.1109/ACCESS.2020.3036370   |
|         | stockmarket            | stock_crash                    | autocorrelation;variance;power_spectrum                                                      | positive                    | 10.1371/journal.pone.0191439  |
|         | stockmarket            | stock_crash                    | autocorrelation;variance;power_spectrum                                                      | mixed                       | 10.1016/j.physa.2021.126459   |
|         | stockmarket            | stock_crash                    | autocorrelation;variance;recovery_rate;<br>flickering                                        | positive                    | 10.1016/j.chaos.2016.03.005   |
|         | stockmarket            | stock_crash                    | motif_transition_intensity                                                                   | positive                    | 10.3389/fphy.2021.800860      |
|         | stockmarket            | stock_crash                    | network_structure                                                                            | positive                    | 10.1038/s41598-019-42223-9    |
| society | anthropology           | population_collapse            | autocorrelation;variance;skewness                                                            | positive                    | 10.1073/pnas.1602504113       |
|         | Arab_spring            | protest                        | nonlinearity                                                                                 | positive                    | 10.1098/rsif.2015.0712        |
|         | farmers                | protest                        | autocorrelation;variance;skewness                                                            | positive                    | 10.31577/cai_2022_2_463       |
|         | housing_market         | financial_crisis               | autocorrelation;skewness;variance;<br>power_spectrum                                         | mixed;negative<br>;positive | 10.1371/journal.pone.0162140  |
|         | housing_market         | market_bubble_burst            | variance;autocorrelation;spectral_analysis                                                   | mixed                       | 10.1140/epjb/e2014-41038-1    |
|         | political_regime       | political_regime_shift         | fisher                                                                                       | positive                    | 10.1016/j.heliyon.2017.e00465 |
|         | social_behavior        | emergencies                    | dynamic_network_biomarkers                                                                   | positive                    | 10.1016/j.ins.2023.01.076     |
|         | social_behavior        | onset_motion                   | autocorrelation;variance                                                                     | positive                    | 10.1371/journal.pcbi.1007821  |
|         | social_behavior        | social_trend_uptake            | autocorrelation;variance                                                                     | positive;mixed              | 10.1073/pnas.1704093114       |
|         | social_media           | drastic_events_in_social_media | variance;autocorrelation                                                                     | positive                    | 10.1093/comnet/cnt022         |
|         | social_media           | social_trend_uptake            | variance;autocorrelation                                                                     | positive                    | 10.1002/cplx.20347            |
|         | socioecological_system | social_transformation          | variance                                                                                     | positive                    | 10.1371/journal.pone.0163685  |
|         | socioecological_system | socio_ecological_regime_shift  | fisher                                                                                       | mixed                       | 10.1080/13504509.2014.978832  |
|         | transport              | traffic_jam                    | autocorrelation;variance;power_spectrum                                                      | positive                    | 10.1109/TITS.2021.3095897     |
|         | transport              | traffic_jam                    | variance;power_spectrum;autocorrelation                                                      | positive                    | 10.1109/TITS.2020.2964021     |

**Table S5 - Physical sciences**

| Field            | System                | Tipping point               | Indicators                                                                                | Performance | DOI                           |
|------------------|-----------------------|-----------------------------|-------------------------------------------------------------------------------------------|-------------|-------------------------------|
| astronomy        | astronomy             | star_dimming                | autocorrelation;variance;<br>detrended_fluctuation_analysis;<br>recurrence_based_analysis | positive    | 10.1051/0004-6361/202038785   |
| engineering      | electronic_assemblies | component_failure           | autocorrelation                                                                           | positive    | 10.1007/s10836-020-05899-w    |
|                  | materials             | material_failure            | autocorrelation;variance                                                                  | positive    | 10.1088/1742-2140/aac009      |
|                  | materials             | phase_transition            | skewness                                                                                  | positive    | 10.1002/sml.202200113         |
|                  | materials             | themoacoustic_instabilities | autocorrelation;variance                                                                  | positive    | 10.1038/srep35310             |
|                  | materials             | wear_out                    | autocorrelation;potential_analysis                                                        | mixed       | 10.1007/s13349-013-0066-z     |
|                  | power_systems         | instability                 | variance;autocorrelation                                                                  | positive    | 10.1109/TSG.2012.2213848      |
|                  | power_systems         | power_blackout              | dynamical_eigenvalue                                                                      | positive    | 10.1126/sciadv.abq4558        |
|                  | thermoacoustics       | themoacoustic_instabilities | autocorrelation;variance                                                                  | positive    | 10.1115/1.4041963             |
|                  | thermoacoustics       | thermoacoustic_instability  | deep_learning                                                                             | positive    | 10.1073/pnas.2106140118 1of9  |
| geoscience       | geology               | earthquake                  | skewness;kurtosis;variance                                                                | mixed       | 10.1007/s11069-016-2460-4     |
|                  | geology               | rock_fracture               | variance;autocorrelation                                                                  | positive    | 10.1155/2020/8820506          |
|                  | geology               | rockfall                    | variance;autocorrelation                                                                  | positive    | 10.1016/j.enggeo.2020.105960  |
|                  | hydrology             | hydrological_regime_shift   | spatial_correlation                                                                       | mixed       | 10.1016/j.jhydrol.2016.05.039 |
|                  | river                 | hydrological_regime_shift   | fisher                                                                                    | positive    | 10.3390/w14162555             |
| material_science | materials             | crack_formation             | degenerate_fingerprinting;<br>potential_analysis                                          | positive    | 10.1088/0964-1726/25/1/015027 |
|                  | materials             | dielectric_breakdown        | variance;spatial_variance                                                                 | positive    | 10.1063/1.4865240             |
|                  | materials             | landslides                  | persistent_pattern                                                                        | positive    | 10.3390/e22010067             |
